# Supplementary material
Source: PubMed Central journal article supplement (PMC7594390)
Supplement: advancesADV2020002395-suppl1.pdf [file advancesADV2020002395-suppl1.pdf]

|                       | CTCL<br>(MF and SS)<br>n = 52 | Negative controls       |                              |              |                                    | Positive controls |                |
|-----------------------|-------------------------------|-------------------------|------------------------------|--------------|------------------------------------|-------------------|----------------|
|                       |                               |                         | B-cell<br>lymphoma<br>n = 12 |              | CD30 <sup>+</sup><br>LPD<br>n = 14 | PCSMLPD<br>n = 12 | AITL<br>n = 13 |
| <b>Age (years)</b>    |                               |                         |                              |              |                                    |                   |                |
| <b>Median (range)</b> | 65 (21 - 91)                  |                         | 70 (96 - 23)                 |              | 63 (22 - 87)                       | 58 (23 - 76)      | 73 (49 - 87)   |
| <b>Gender</b>         |                               |                         |                              |              |                                    |                   |                |
| <b>Male</b>           | 36 (69%)                      |                         | 5 (42%)                      |              | 8 (57%)                            | 5 (42%)           | 5 (39%)        |
| <b>Clinical stage</b> |                               | <b>Type of lymphoma</b> |                              |              |                                    |                   |                |
| IA                    | 4                             | <b>Follicle center</b>  | 3                            | <b>cALCL</b> | 9                                  |                   |                |
| IB                    | 7                             | <b>Marginal zone</b>    | 3                            | <b>LP</b>    | 5                                  |                   |                |
| IIA                   | 3                             | <b>Leg-type</b>         | 5                            |              |                                    |                   |                |
| IIB                   | 9                             | <b>Intravascular</b>    | 1                            |              |                                    |                   |                |
| IIIA                  | 9                             |                         |                              |              |                                    |                   |                |
| IIIB                  | 3                             |                         |                              |              |                                    |                   |                |
| IVA1                  | 12                            |                         |                              |              |                                    |                   |                |
| IVA2                  | 5                             |                         |                              |              |                                    |                   |                |

**Supplementary Table 1. Clinical characteristics of the CTCL patient population (n = 52) and controls (n=51) for the evaluation of ICOS expression.** CTCL = cutaneous T-cell lymphoma. MF = Mycosis Fungoides. SS = Sézary Syndrome. CD30<sup>+</sup> LPD = CD30<sup>+</sup> lymphoproliferative disease. cALCL = cutaneous anaplastic large cell lymphoma. LP = lymphomatoid papulosis. PCSMLPD = primary cutaneous CD4<sup>+</sup> small/medium T-cell lymphoproliferative disorders. AITL = angioimmunoblastic T-cell lymphoma.

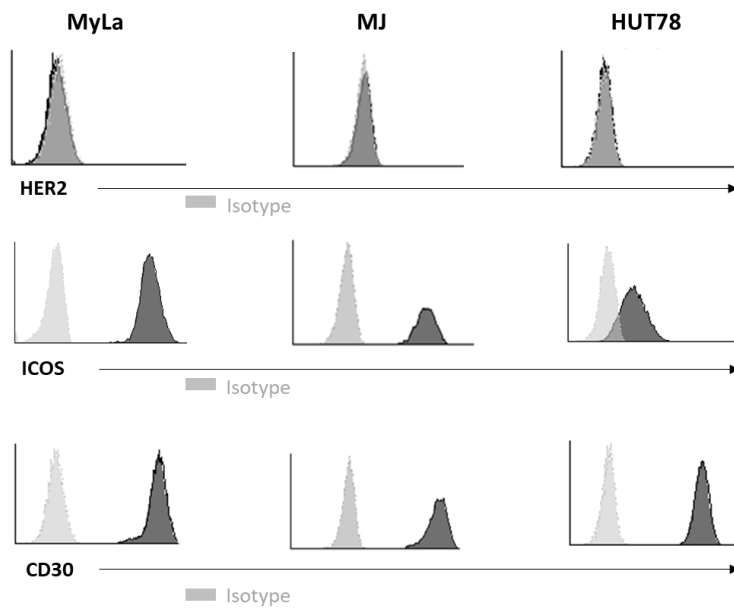

**Supplementary Fig 1. Flow cytometry dot plots of CTCL cell lines showing the expression of HER2, ICOS and CD30 by MyLa, MJ and HUT78.**

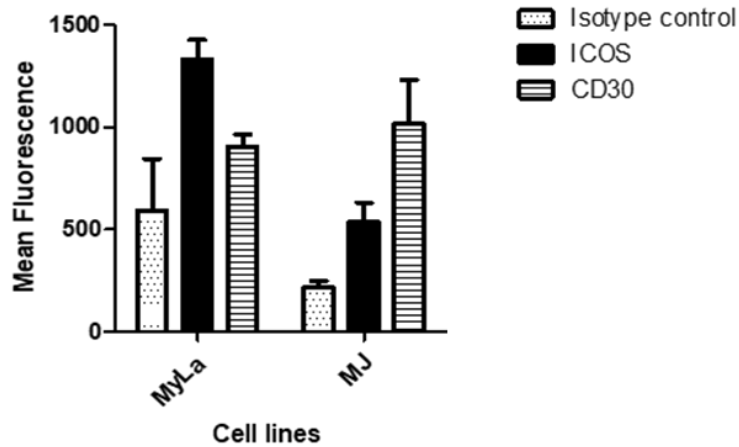

**Supplementary Fig 2. Measurement of antibody internalization of MyLa and MJ with pHAb Reactive Dyes.** We used a pHAb Reactive Dyes assay (Promega) to evaluate the internalization of anti-ICOS and anti-CD30 mAbs in MyLa and MJ cell lines. pHAb dyes are non-fluorescent at a neutral pH and become highly fluorescent at an acidic pH. Antibodies were linked to magnetic protein G beads, then labeled with pHAb Amine Reactive Dye. pHAb-conjugated antibodies were then co-incubated with cell lines for 20 hours at 37°C. Fluorescence of internalized antibodies was detected using flow cytometry (532 nM, PE detector). Note that anti-ICOS mAbs are internalized more in MyLa than in MJ cells, while it is the opposite for anti-CD30 mAbs.

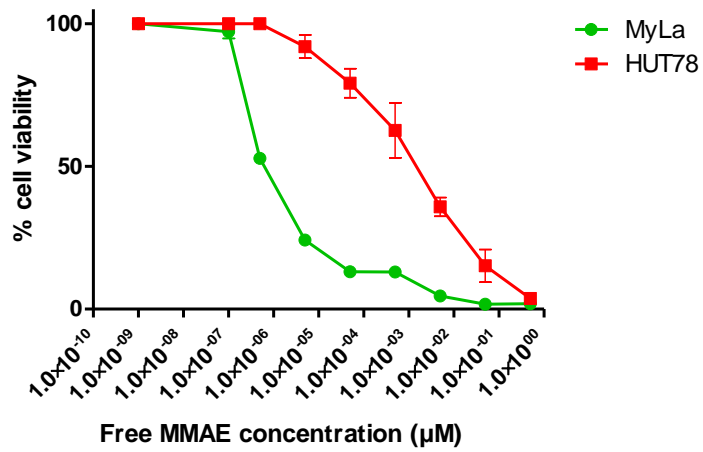

**Supplementary Fig 3. HUT78 cell line displays resistance to MMAE.** Percentage of cell viability in increasing free-MMAE concentrations (mean of triplicates), assessed with alamarBlue™. Free-MMAE was purchased from Selleckchem (Houston, TX, USA).
